# Supplementary material
Source: MDPI journal article supplement (https://www.mdpi.com/2073-4433/15/4/421)
Supplement: s1 [file s1]

# Analysis of the Influencing Factors and Sources of Brown Carbon Light Absorption in a Typical Megacity of the Yangtze River Delta, China

Shanshu Xu <sup>1</sup>, Junfeng Wang <sup>1,\*</sup>, Yue'e Li <sup>2</sup>, Ning Zhang <sup>1</sup>, Xinlei Ge <sup>1</sup>, and Eleonora Aruffo <sup>3</sup>

**Table S1.** MAC for BC corresponding to AE31 has been provided by the manufacturer. The compensation parameter (f) as a function of wavelength for aethalometer AE31 obtained using:

| Wavelength (nm) | MAC (m <sup>2</sup> g <sup>-1</sup> ) | f     |
|-----------------|---------------------------------------|-------|
| 370             | 39.5                                  | 1.322 |
| 470             | 31.1                                  | 1.292 |
| 520             | 28.1                                  | 1.254 |
| 590             | 24.8                                  | 1.233 |
| 660             | 22.2                                  | 1.230 |
| 880             | 16.6                                  | 1.212 |
| 950             | 15.4                                  | 1.210 |

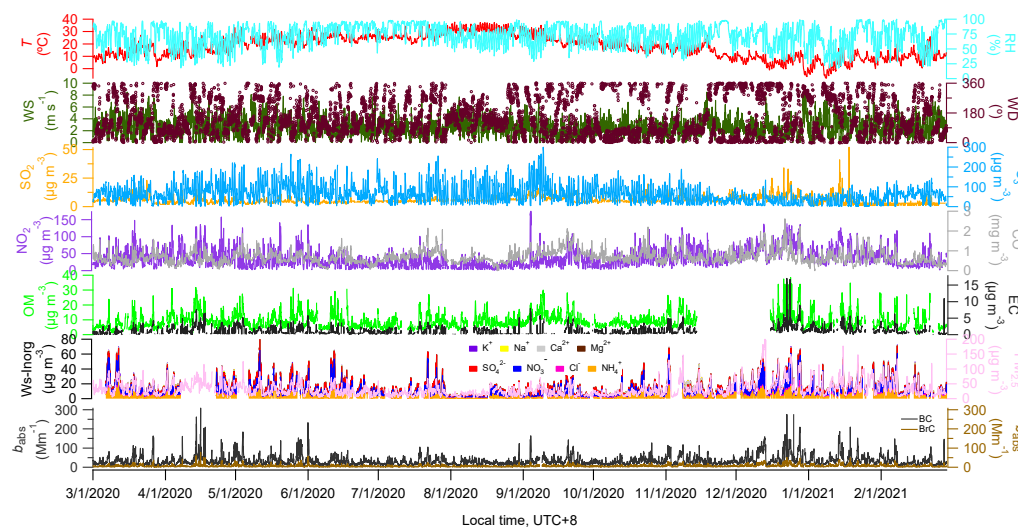

**Fig. S1.** Temporal variations of meteorological parameters, hourly averaged concentrations of gas and major PM<sub>2.5</sub> species and absorption coefficients of BrC and BC at 370 nm.

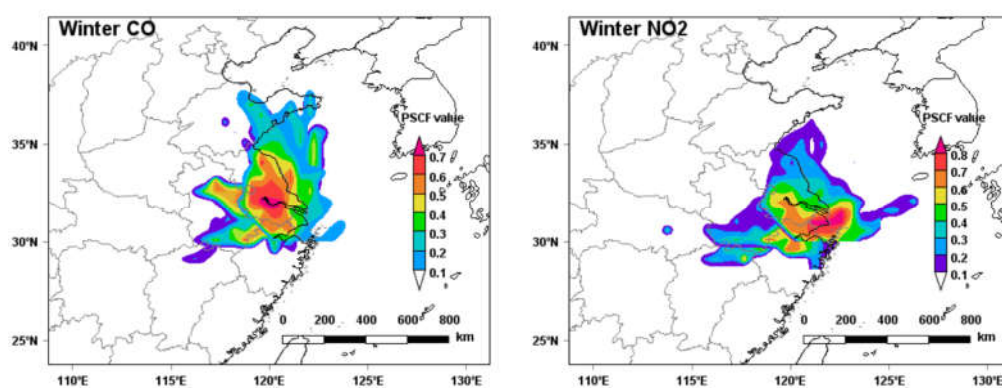

Fig. S2. Potential source areas for CO and NO<sub>2</sub> in winter. The color code denotes the PSCF probability.

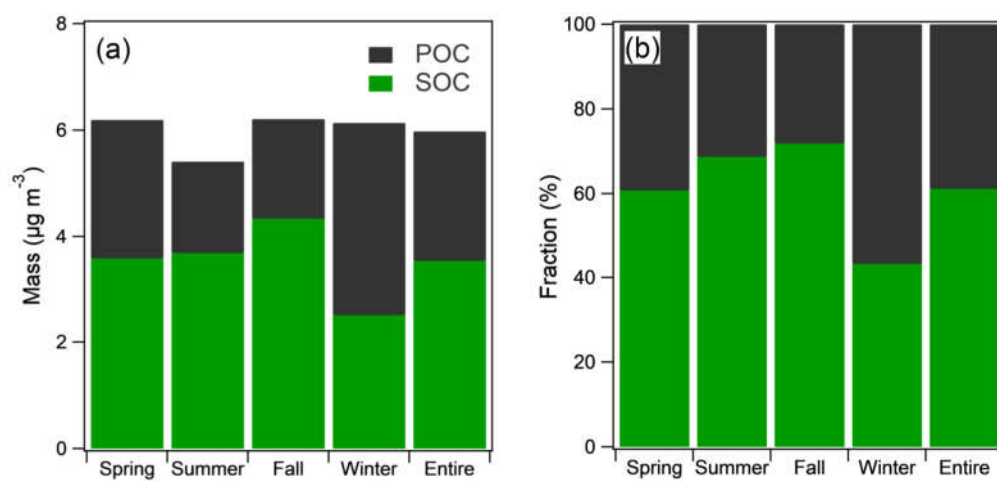

Fig. S3. Seasonal variations of mass concentrations and mass fractions of POC and SOC.

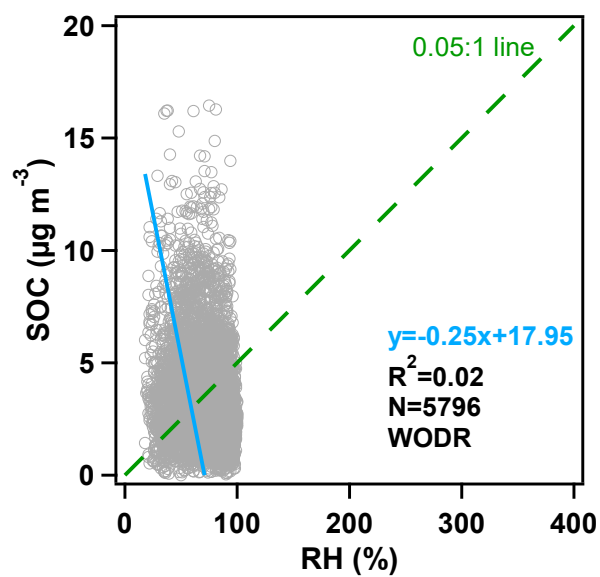

Fig. S4. Scatter plot of SOC and RH all the year round.

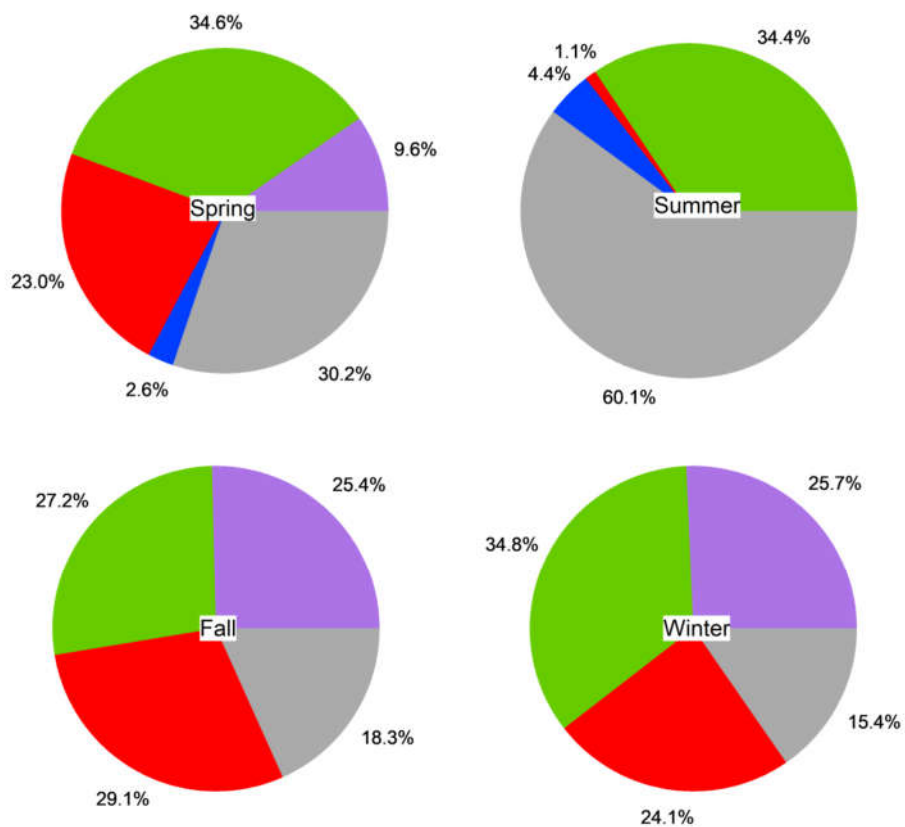

Fig. S5. The proportion of BrC in five factors.

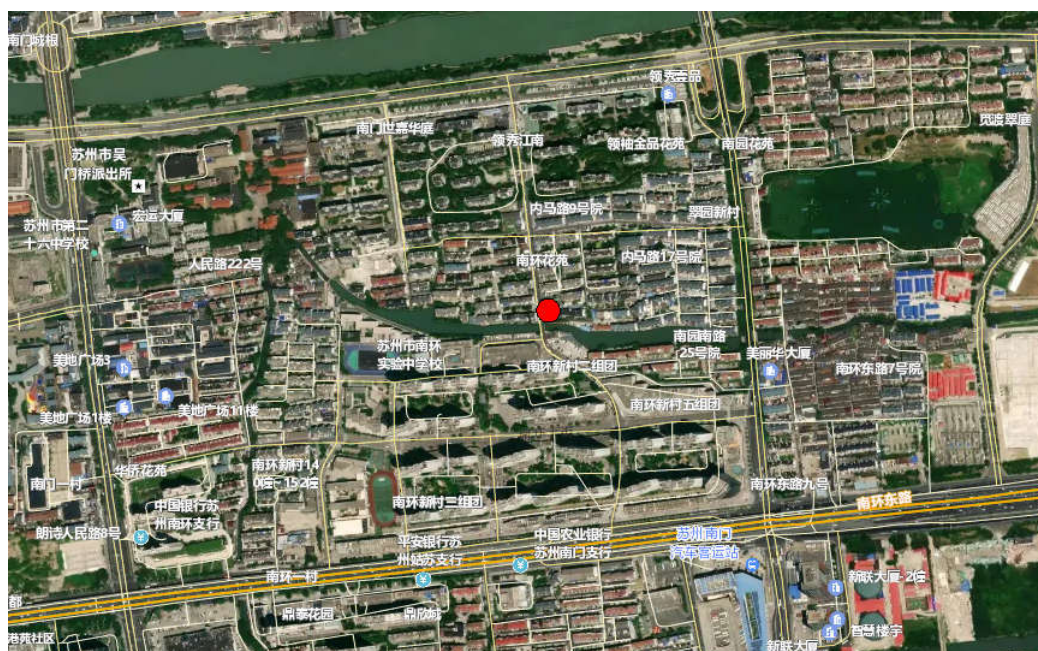

Fig. S6. Location of the sampling site and surrounding region.

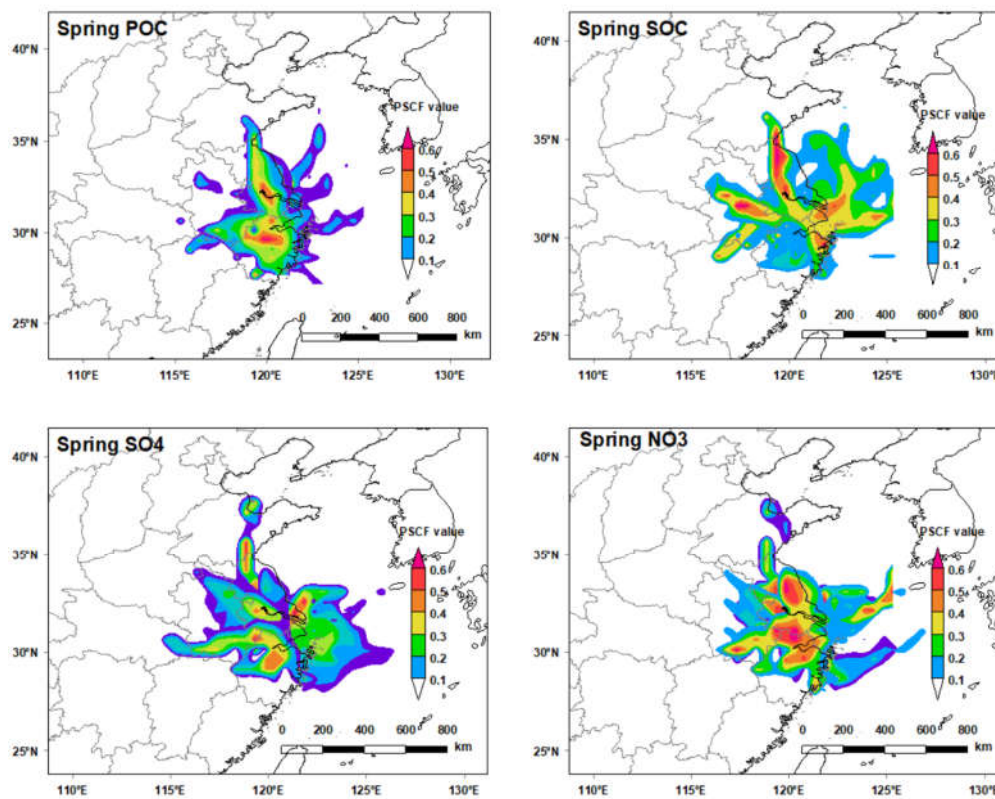



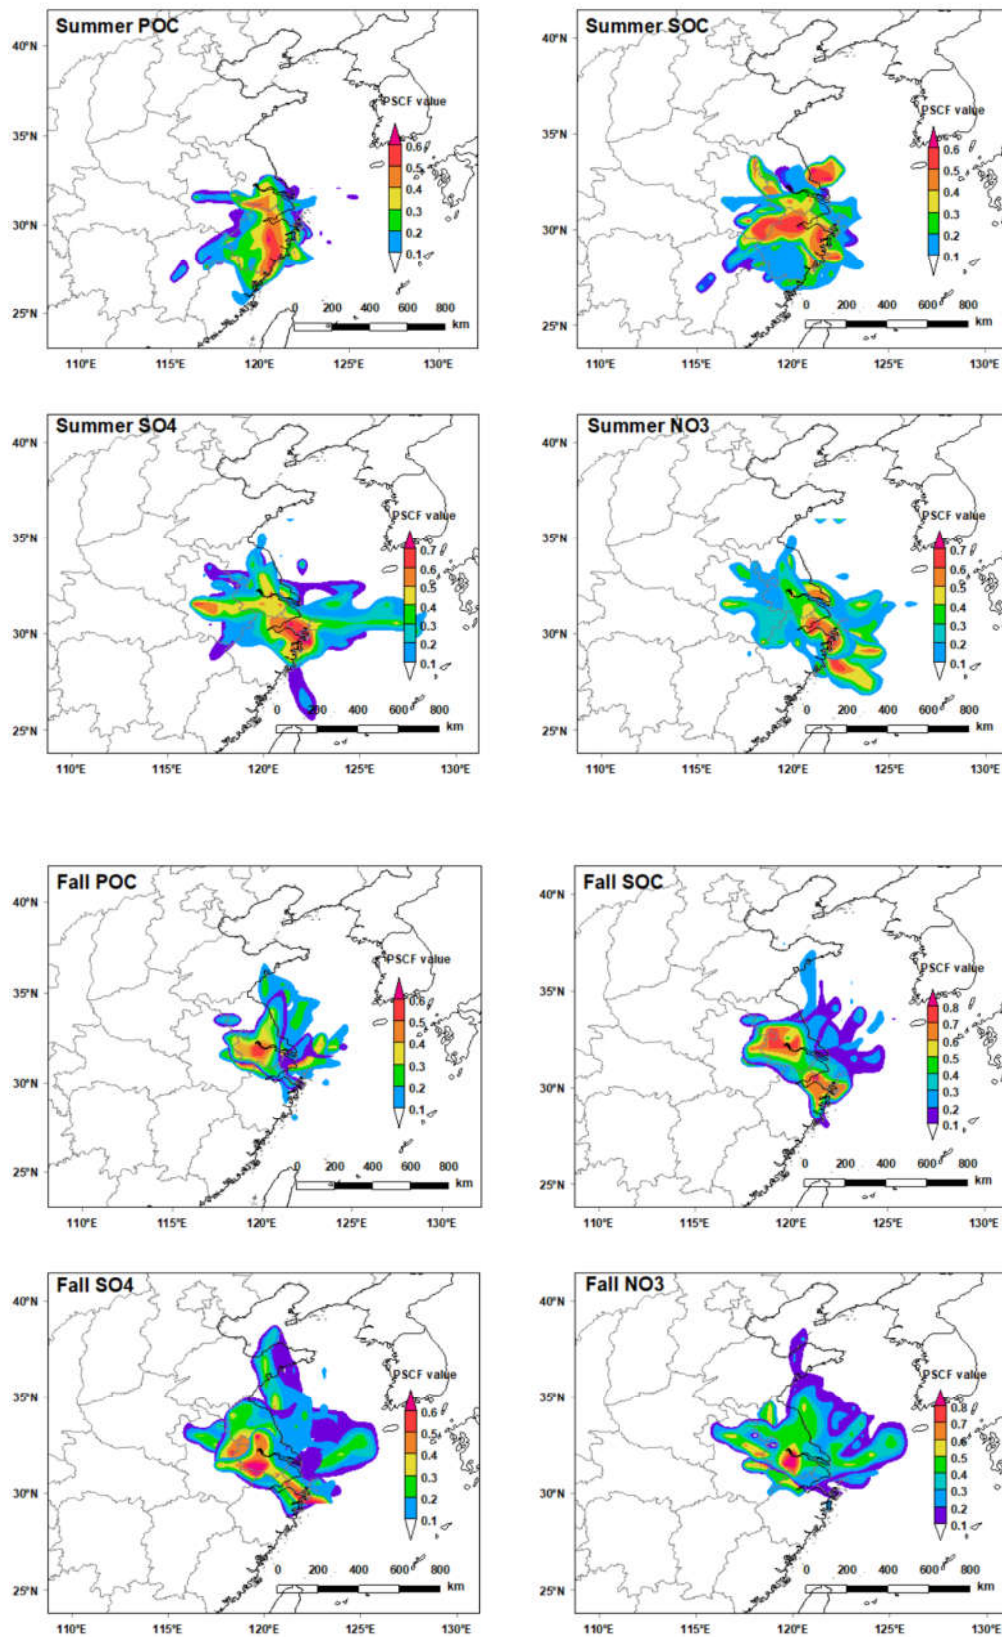

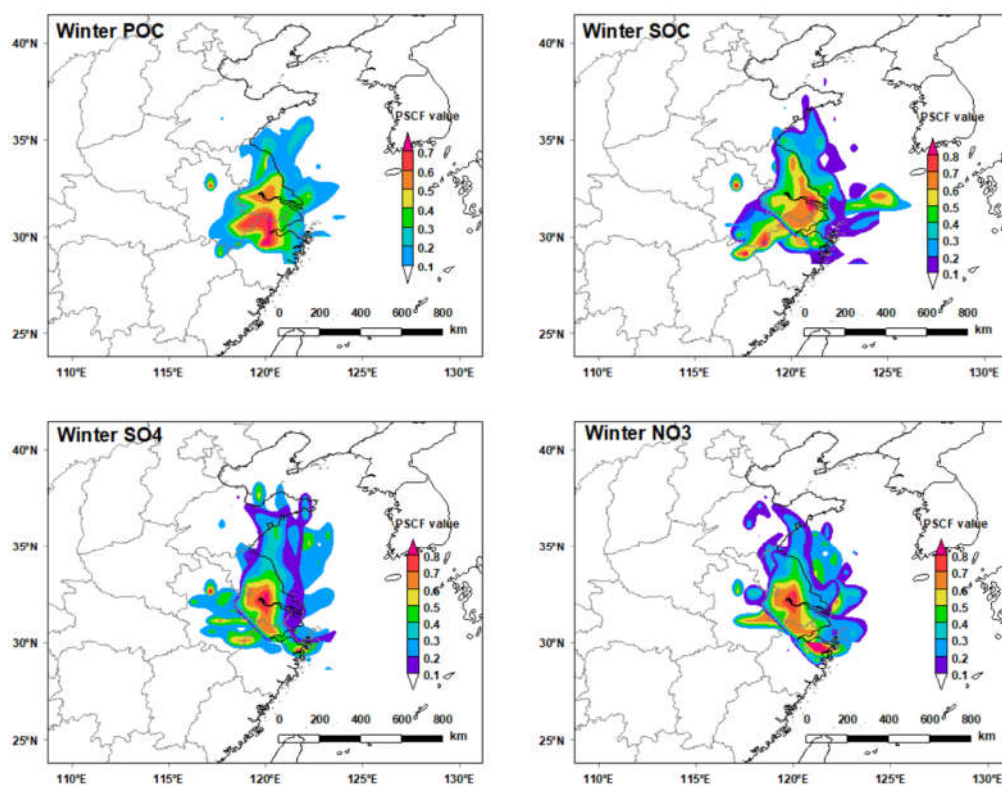

Fig. S7. Potential source areas for POC, SOC,  $\text{SO}_4^{2-}$  and  $\text{NO}_3^-$  in four seasons. The color code denotes the PSCF probability.
